# Supplementary material for: Gene Expression Profiling Reveals that PXR Activation Inhibits Hepatic PPARα Activity and Decreases FGF21 Secretion in Male C57Bl6/J Mice
Source: MDPI journal article supplement (doi:10.3390/ijms20153767), 2019-08-01

## SUPPLEMENTARY INFORMATION FOR

### Gene expression profiling reveals that PXR activation inhibits hepatic PPAR $\alpha$ activity and decreases FGF21 secretion in male C57Bl6/J mice

Sharon Ann Barretto <sup>1,\*</sup>, Frederic Lasserre <sup>1,\*</sup>, Anne Fougerat <sup>1</sup>, Lorraine Smith <sup>1</sup>, Tiffany Fougeray <sup>1</sup>, Celine Lukowicz <sup>1</sup>, Arnaud Polizzi <sup>1</sup>, Sarra Smati <sup>1</sup>, Marion Régnier <sup>1</sup>, Claire Naylies <sup>1</sup>, Colette Bétoulières <sup>1</sup>, Yannick Lippi <sup>1</sup>, Hervé Guillou <sup>1</sup>, Nicolas Loiseau <sup>1</sup>, Laurence Gamet-Payraastre <sup>1</sup>, Laila Mselli-Lakhal <sup>1</sup> and Sandrine Ellero-Simatos <sup>1,\*</sup>

Supplementary Table 1: Gene Enrichment Analysis on the 1029 hepatic genes induced by PCN-treatment only in WT mice (prototypical *Pxr* target genes, fold-change>1.5 & adjusted p-value<0.05) in the liver. See enclosed excel file.

Supplementary Table 2: Impact on PCN treatment on all XMEs in the liver and in the ileum. See enclosed excel file.

Supplementary Table 3: Primers used for qPCR

Supplementary Figure 1: Effect of PCN treatment on additional plasmatic parameters. Data are shown as mean $\pm$ SEM of n=5-6 per group. \*p $\leq$ 0.05, \*\*p $\leq$ 0.01, \*\*\*p $\leq$ 0.005 for PCN effect using 2-way ANOVA and Bonferroni's post-tests.

Supplementary Figure 2: Heatmap representing the significantly regulated genes (fold-change>1.5 & corrected p-value < 0.05). Hierarchical clustering is also shown, which allows the definition of five gene clusters. For each gene cluster, the mean expression value is shown on the box-plots.

Supplementary Figure 3: Microarray data and complementary qPCR confirmation in the liver for selected genes involved in *de novo* lipogenesis. Data are shown as mean $\pm$ SEM of n=5-6 per group. \*p $\leq$ 0.05, \*\*p $\leq$ 0.01, \*\*\*p $\leq$ 0.005 for PCN effect and #p $\leq$ 0.05, ##p $\leq$ 0.01, ###p $\leq$ 0.005 for genotype effect using 2-way ANOVA and Bonferroni's post-tests.

Supplementary Figure 4: Microarray data and complementary qPCR confirmation in the liver for selected genes involved in (a) cholesterol synthesis and (b) fatty acid / cholesterol transport. Data are shown as mean $\pm$ SEM of n=5-6 per group. \*p $\leq$ 0.05, \*\*p $\leq$ 0.01, \*\*\*p $\leq$ 0.005 for PCN effect and #p $\leq$ 0.05, ##p $\leq$ 0.01, ###p $\leq$ 0.005 for genotype effect using 2-way ANOVA and Bonferroni's post-tests.

Supplementary Table 3 Oligonucleotide sequences for real-time PCR

| Gene             | NCBI Refseq | Forward primer (5'-3')       | Reverse primer (5'-3')     |
|------------------|-------------|------------------------------|----------------------------|
| <i>Abca1</i>     | NM_013454   | GCGCTACAACATGGACATCCT        | GCTGGGTCGGGAGATGAGA        |
| <i>Abcg5</i>     | NM_031884   | TCGCCACGGTCATTTTCA           | GCCAAAAGAGCAGCAGAGAAATA    |
| <i>Acly</i>      | NM_134037   | AAAGCTTGGCCTCGTCGG           | GGGACGAAGGGTTCAATGAGA      |
| <i>Acot1</i>     | NM_012006   | CGATGACCTCCCCAAGAACA         | CCCAAGCAGCCCAATTCC         |
| <i>Bmal1</i>     | NM_007489   | CAAACCTACAAGCCAACATTTCTATCAG | TCGGTCACATCCTACGACAAAC     |
| <i>Cd36</i>      | NM_007643   | GTAAACAAAGAGGTCCTTACACATACAG | CAGTGAAGGCTCAAAGATGGC      |
| <i>Cyp2c55</i>   | AY206875    | TTGTGGAAGAGCTAAGAAAAGCAAAT   | GAGCACAGCTCAGGATGAATGT     |
| <i>Cyp3a11</i>   | NM_007818   | TCACACACACAGTTGTAGGCAGAA     | GTTTACGAGTCCCATATCGGTAGAG  |
| <i>Cyp4a10</i>   | NM_010011   | ATTAGTGAGAGTGAGGACAGCAACAG   | CCAACCCGATTTGCAGACA        |
| <i>Cyp4a14</i>   | NM_007822   | TCAGTCTATTTCTGGTGCTGTTC      | GAGCTCCTTGTCCTTCAGATGGT    |
| <i>Cyp7a1</i>    | NM_007824   | ATCAAAGAGCGCTGTCTGGGT        | GCGTTAGATATCCGGCTTCAAAC    |
| <i>Fasn</i>      | NM_007988   | AGTCAGCTATGAAGCAATTGTGGA     | CACCCAGACGCCAGTGTTTC       |
| <i>Fgf21</i>     | NM_020013   | AAAGCCTCTAGGTTTCTTTGCCA      | CCTCAGGATCAAAGTGAGGCG      |
| <i>Ldlr</i>      | NM_010700   | GCAAGGACATGAGCGACGA          | CTCCCCACTGTGACACTTGAAC     |
| <i>Lpin1</i>     | NM_172950   | ATGTTTCCCATAGAGATGAGCTCG     | GAATGGTGGTACATCATTAGGAAGAG |
| <i>Ppara</i>     | NM_011144   | CCCTGTTTGTGGCTGCTATAATTT     | GGGAAGAGGAAGGTGTCATCTG     |
| <i>Pparγ2</i>    | NM_011146   | GATGCACTGCCTATGAGCACTT       | GAATGGCATCTCTGTGTCAACC     |
| <i>Pxr</i>       | NM_010936   | AGAGATCATCCCTCTTCTGCCAC      | GATCTGGTCCTCAATAGGCAGGT    |
| <i>Rev-erba</i>  | NM_145434   | CAGCTGGTGAAGACATGACGAC       | GGAGGAGCCACTAGAGCCAA       |
| <i>Scd1</i>      | NM_009127   | CAGTGCCGCGCATCTCTAT          | CAGCGGTACTCACTGGCAGA       |
| <i>Sqle</i>      | NM_009270   | GGAGGCTACCGTGTCTCTCCA        | CTGCACTTGGTTGGTTTCTGAC     |
| <i>Srebp1a/c</i> | NM_011480   | CAGACACTGGCCGAGATGTG         | CTTGGTTGTTGATGAGCTGGAG     |
| <i>Srebp2</i>    | NM_033218   | GTACTGCGCCCAGAGGAGC          | GCCTGAGGTTTCACCAAGGAC      |

Supplementary Figure 1

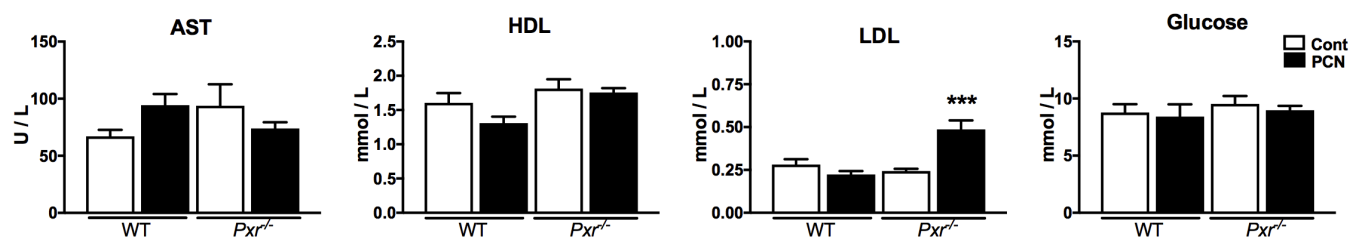

Supplementary Figure 2

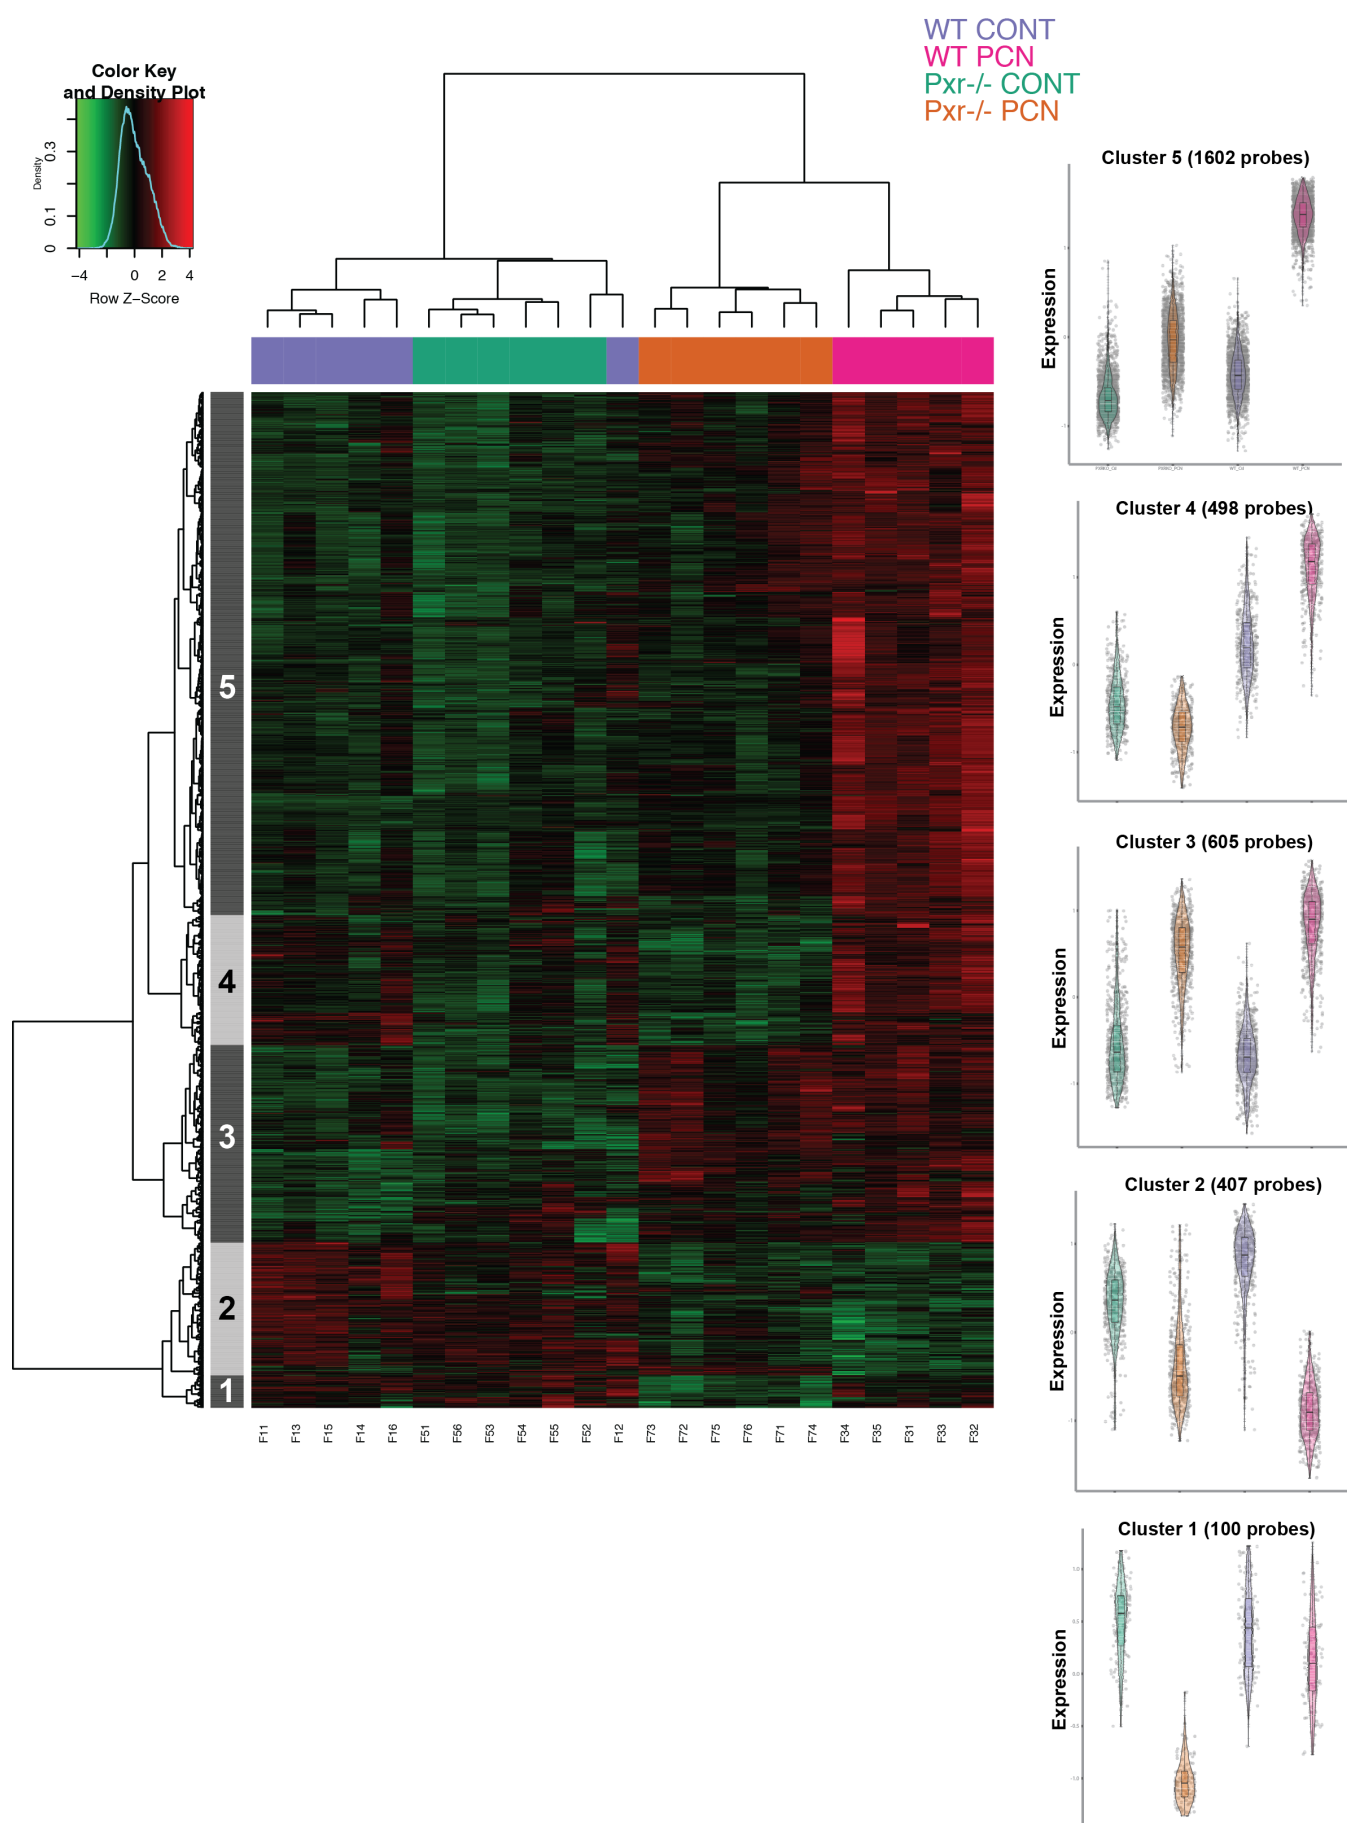

Supplementary Figure 3

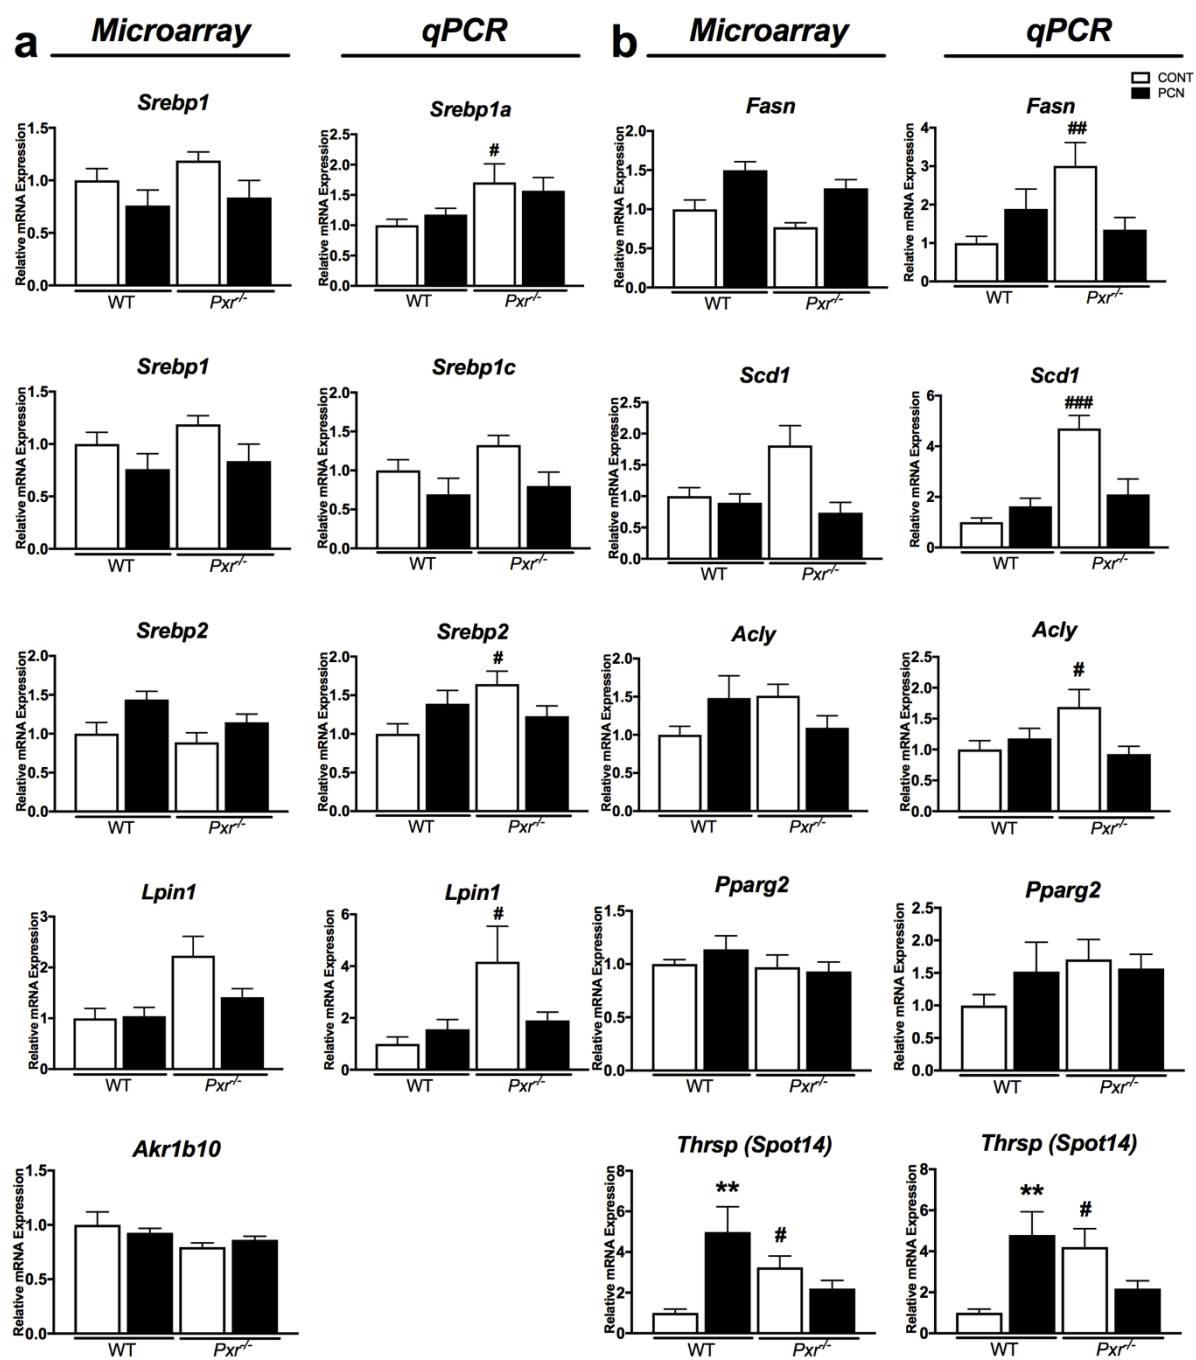

Supplementary Figure 4

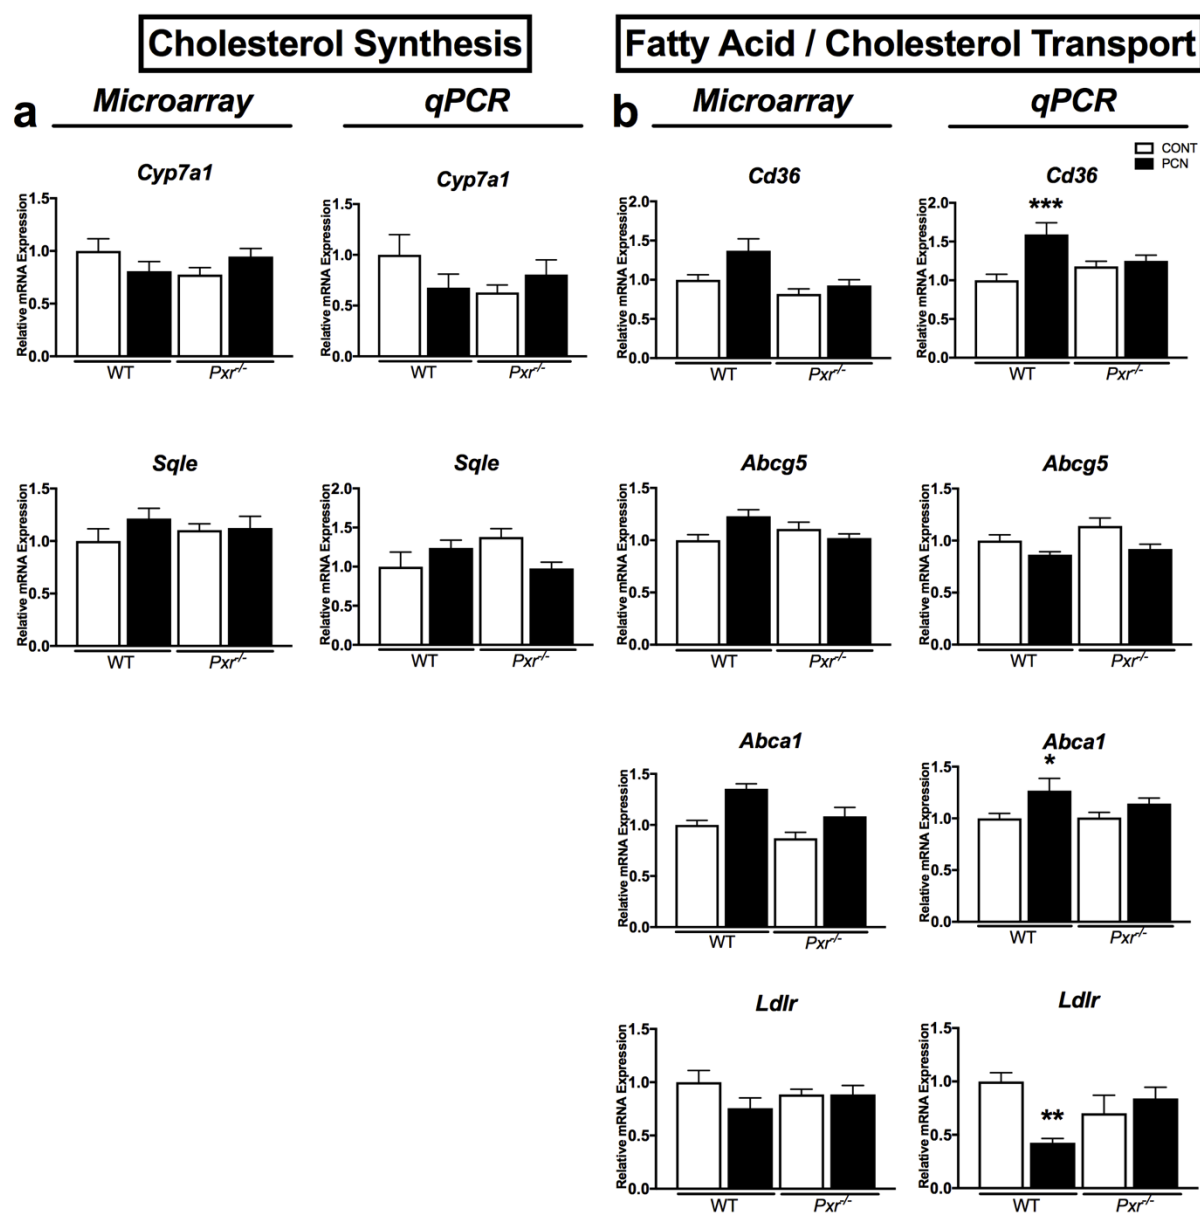

Supplement: s1 [file s1]
